# Supplementary material for: lncRNA RP11-147L13.8 suppresses metastasis and chemo-resistance by modulating the phosphorylation of c-Jun protein in GBC
Source: PubMed Central journal article supplement — Mol Ther Oncolytics. 2021 Sep 3;23:124–37. doi: 10.1016/j.omto.2021.08.016 (PMC8507201; doi:10.1016/j.omto.2021.08.016), 2021-09-03
Supplement: mmc1.pdf [file mmc1.pdf]

OMTO, Volume 23

## Supplemental information

### **lncRNA *RP11-147L13.8* suppresses metastasis and chemo-resistance by modulating the phosphorylation of c-Jun protein in GBC**

**Bohao Zheng, Jiwen Wang, Kun Fan, Wentao Sun, Wenze Wan, Zhihui Gao, Xiaojian Ni, Dexiang Zhang, Xiaoling Ni, Tao Suo, Han Liu, Houbao Liu, and Sheng Shen**

## Supplementary Figures

**Figure S1** The validation of top ten down-regulated long non-coding RNA.

**A:** The volcano map presented the top ten upregulation (red spot) and downregulation (blue spot) long non-coding RNA in gallbladder cancer. Data represent mean  $\pm$  s.e.m. (Three biological replicates).

**B:** The list of the top ten upregulation and downregulation long non-coding RNA in gallbladder cancer.

**C:** The qPCR results validated that RP-11147L13.8 was significantly downregulated in the 24 pairs of GBC tissues.

**Figure S2** LNCipedia and CPAT databases indicate that there is no protein-coding ability for RP11-147L13.8.

**Figure S3** The basic information of RP11-147L13.8 and the establishment of the stable knockdown and overexpression GBC cells.

**A:** The expression level of *RP11-147L13.8* among different kinds of tumors and human tissues.

**B:** The identification of full-length *RP11-147L13.8* in GBC-SD cells. Representative images and the boundary of the PCR products from 5' RACE and 3' RACE were shown.

**C:** The expression levels of *RP11-147L13.8* in different GBC cell lines, including GBC-SD, SGC-996, G-415, TGBC2TKB, TGBC24TKB, and NOZ cell lines.

**D:** The distribution of *RP11-147L13.8* in cyto-plasma (35%) and nucleus (65%) of GBC-SD cell lines.  $\beta$ -actin serves as a cytoplasmic marker, while U6 serves as a nuclear marker. Values are shown as mean  $\pm$  S.E.M.

**E:** qPCR results indicated the altered expression level of RP11-147L13.8 in different groups of cell lines (Vector, OE, shNC, shlnc1, shlnc2, shlnc3).

**Figure S4** *RP11-147L13.8* could significantly suppress the metastasis of GBC in vivo.

**A:** The tumor formation was observed 7 days after the injection of the cell lines. No significant differences were observed in the tumor volume. Data represent mean  $\pm$  s.e.m. Student's t-test. \* $P < 0.05$ ; \*\* $P < 0.001$ ; \*\*\* $P < 0.0001$ .

**B:** No significant differences were observed in the tumor weight. Data represent mean  $\pm$  s.e.m. Student's t-test. \* $P < 0.05$ ; \*\* $P < 0.001$ ; \*\*\* $P < 0.0001$ .

**C:** Representative images of H&E staining in the metastatic liver loci and statistical data comparing the knockdown group with the control group. (n=6)

**D:** Representative images of H&E staining in the metastatic lung loci and statistical data comparing the knockdown group with the control group. (n=6)

**Figure S5 The correlation between the RP11-147113.8 and the expression level of c-Jun-ser73 protein and the prognostic significance of c-Jun protein.**

**A:** The typical immunohistochemistry image of the low and high expression of c-Jun-ser73 in gallbladder cancer tissue. (magnification:  $\times 200$ )

**B:** Patients with high expression levels of c-Jun-ser73 (red line) were associated with poorer overall survival. (Log-rank test,  $P=0.03$ ).

**C:** The expression level of RP11-147L13.8 was negatively correlated with the expression level of c-Jun-ser73 ( $R=-$ ;  $P=0.002$ ). Spearman correlation analysis.

**Figure S6 A mechanistic model for the function of RP11-147L13.8 in gallbladder cancer.**



# Figure S2

## CPAT analysis of RP11-147L13.8

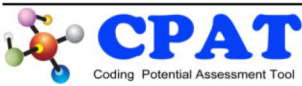

[Calculator](#) [User Guide](#) [Feedback](#) [Source Code](#)

Result for species name : hg19 with job ID : 1626712581

| Data ID | Sequence Name | RNA Size | ORF Size | Ficket Score | Hexamer Score   | Coding Probability | Coding Label |
|---------|---------------|----------|----------|--------------|-----------------|--------------------|--------------|
| 0       | RP11-147L13.8 | 2919     | 336      | 0.757        | -0.150597546964 | 0.037066854677152  | no           |

This job has been stored with the job ID  
[Download Table in tab delimited file \(.txt\)](#)

For suggestions, comments or queries about this website,  
please leave your feedback through [Feedback](#).  
Copyright © 2012. All rights reserved.

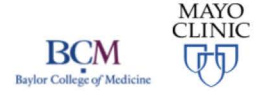

### RNA sequence data of RP11-147L13.8

```
AGGACTTTGAAGACCCAAGCAGCCAAAAATAGCTAATTCCTCCTTATTTTCAGTTGGTATGAAGAGAAGGTTACTAATAATGCTGCTCTTCCAGC
ACAAGTCTTCTGGGCTGTCAGTGAGCTTGGTCAAGTGGGAACACAGGAAATTATGAGTTATGTTTGTATATATGAGAGGAAAATTGAGGCTACC
AGTCTTGTACACAGGGTTTATAGATAAATGCTTGTGTGCCACCACGCTGGATAATTTTTGTATTTTTAGTAGACAGGGGATTTCCACCATGTTGGC
CAGGCTGGTCTCAAGCTCCTGACCTCAGGTGATCTGCCTGGCCTCCCAAAGTGTCTGGGATTACAGGCGTGAGCCACCGGCCAGCA
CCCCATTAATCTTATACAAAGCCTCTTCAAACCTTGGCTCCAATGGAGGGAATTGATACTTCAGCAATATTCTGTCTTCTACTCCATGAGCATAA
ACTGATGCTATCCTGAGCAAAGTGAATGATTACCCTATGAAGGTTTCAGTAATAATAGGGGATTTTTGGCATTAGTTTGAGACCTACAGCCT
GTGCCAAAAGTGAACAGGAAGCATCACATTTAAAAGATGTATAAAATATGTCTATATCTATCCATTTGATATGGCTTGACTGTGTCACCACCCAAA
TCTTATTTGGAATTTCCACATGTTGTAGGAGGGAACCGGTAGGAGGTAATTGAATCATGGGGGCAAGTCTCCCGTGCTATTTTCATGATAGTGAA
TAAGTCTCAGCATATCTGATGGTTTTAAAAAAGGAGTCCCTGCACAAGCTCTGTGTTTTGCCTACTGCCATCTGAAGCGTGACTTTGC
TCTCCTTGGCCTTCTAATAACATCATCTATCTGGTTATTTTCATACATATTTTCTAGCATTTTTATTATTGGTTTTCTCAAACCTTTCAGAAAATAATA
TGTATATTTTCCACCATGATCAACTGTGCATATTAATATATATTATTTGGTATATGAATGTGGATTTCATAATTGAGATTATGTTCCAATGAGTCATAG
TAAAAGTACAGAAAATTAATATTTCTAATGCCATTCAACCGATGATTATATAAAATTAGCCTTTATGTCAAGTTCTCATTGCTCTTGAATTTTCATT
CCAAACAGAATTTTGAATTCATATTTTGAATAGTATAGCTGTACATACTAAATAGTTTAAATAACCCACATCTAATGCAAATTTACATTAAGAT
TTTACATAAATAATTATGGTGTAGAGTATGACAATCCTATTTCAAACCCACAGAGCCCTAGAAAAACAATTTCTGATTTTTTCAGATATCTCAAAT
ACTGTAAAATACAGTATAAATAAGAAATAATTAGCCATGAGGTCAAACCTTCAATTTCAAACATTATAAAAAGTAAAATTAAGAGTTAAAATCTAAAACC
ACATGAAAATTTATTCTTCAATATAATCTCAAATTTGAAAACGTTATATAAGATTATGCATTCATTAGAAAAGTGATTTATTGTAATTTTATAAGATTT
GCCAATTTTTAAAGGTGATTTTTGATCAATGCAATTAATGTTAAAATATTATGCTATACATTATTAGTTCATGACACATTTTCAAATATGAATGT
GATGTAGAAACAGGTGATTATCAGAAAATAAACTCTGTTTTAGTTTAAAGACTAAATTAAGCTACCAAAAAGAAAATTTAGTTTCAAGATAGGAAA
GTTTATTTGTAAGGATGCTGGGATGTTTGAACCCAAGATGAGTGATGTTTAAAAGGTTTTGCAATGGCATTCAATGAATAAAAAATGTTTAGAGTT
CAGTAACCTTCAGTTACCATTTTTGGACAGATAACAAGAGATCCAATCTGACTAGCAGAGAATAGTGTAAAGACATTTAGAATAGTTAGCAGTTTTAAT
CAGAGGGTAGACAGATTATTTTCCAATGTAGAGTACATATTTCTCCATTTGCATAATCCTCACCAGTGGGTAGAATTTATGAAGAATAGAATTTGG
TTCATGAAAAGAAAAGCAGGCAGGAACATAACATGATATAACTTTCTTCATATTTAATAACTGAAGTTTACTCCTATTTTGGAGACTCAATTCGATA
GAAGTTGAAAATTAATCTGTCAAGTTAACCTATCTTAACCCCTGCCATGTAGAGAATTGAACTAGCCTTCGCTCTCATAAGTGGAAATTTTAA
AAAATAATGAGTTACATGAGCTGATAAGCACACATGCATAGTCAATGTTAAAGGCTTAGCATTATAAAATTTGGGATGATAATTTTGGCAAATGT
TTAACACATTTAATAAGATAAAATAGTTTTTAAAGCATTGAATAGGTAGGAGTTTCAATGAGTTTACTCTGGGTTGCTATTACTTTTACATAGTCAAA
CTTTATTTTGTAGTATTTTTCTTCTTCTGATTCTCTAGTCACTATGATAATTATTAGTATGGATGGTGACTTTTTATTTCCAAGCACAGCATAATCCACAA
TAACATAACATTTAAAAGCAAAGGCTCTGTATCGATTATTAACATGAACAATTTCTTTGCTACCATACTCCATCCAGATAAAGAAGCTGAATGTTCC
TCTGAACCTTCCAATTAATTTCTCCATTTGTGATGAATCCTCCATAGATTTATTGGCAAACATTTTCTAAGTGTCTCCACCCTACTATAAAT
GTCTCAAAATAGTTTGTCTACCAACAAGGTAGTATAGACTATAAACTTAATAAATAGTAATTATTGATAATTATGAGATACCAGGATGCTAATGA
AACTTTATTGCTTATTGAGAAAATGAGAGTATAAATGAGTATAAAATGAAAAGACTTGAATGCTTAGTAAAGCATATAAATGTAGCTAAAGTTATT
AAACAGATATATGTATATGCCAA
```

### Lncipedia data of RP11-147L13.8

#### Protein coding potential

| Metric                           | Raw result | Interpretation |
|----------------------------------|------------|----------------|
| PRIDE reprocessing 2.0           | 0          | non-coding ?   |
| Lee translation initiation sites | 0          | non-coding ?   |
| PhyloCSF score                   | 9.343      | non-coding ?   |
| CPAT coding probability          | 7.35%      | non-coding ?   |
| Bazzini small ORFs               | 0          | non-coding ?   |

In stringent set: yes

# Figure S3

ENSG00000267731.1 Gene Expression from GTEx(Release V6)

## A

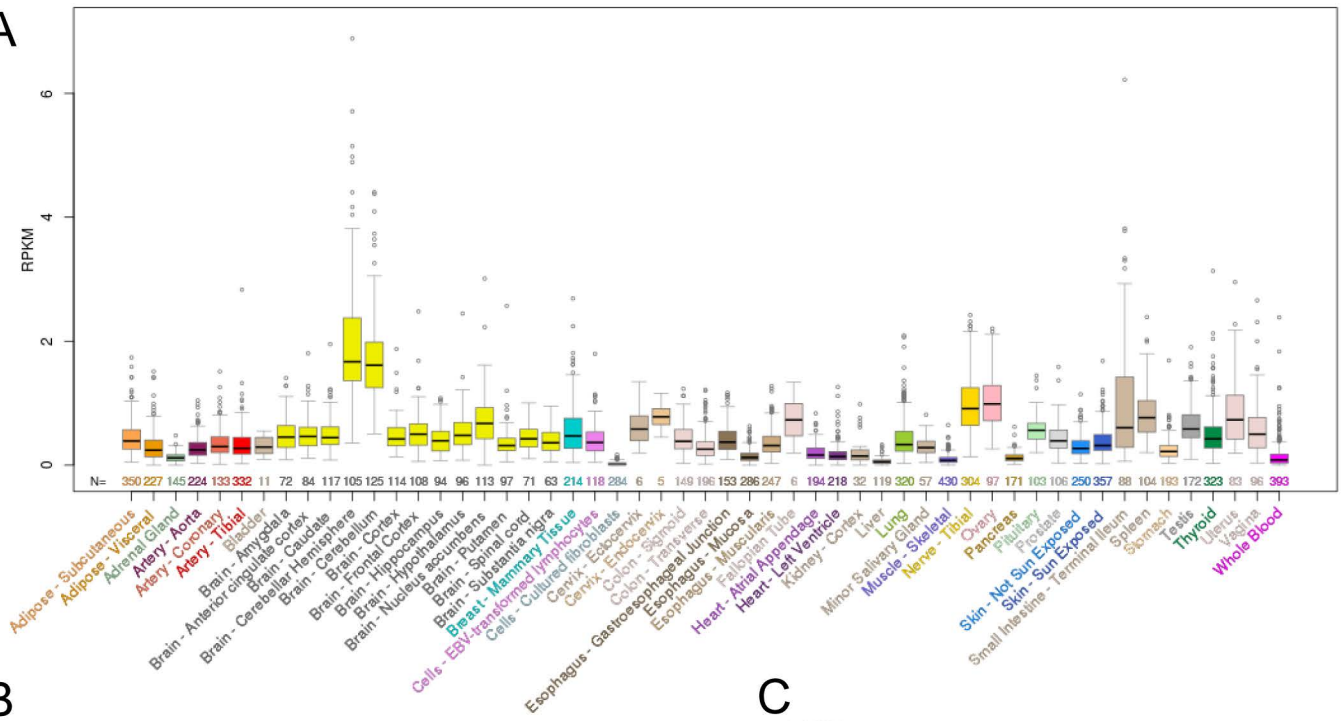

## B

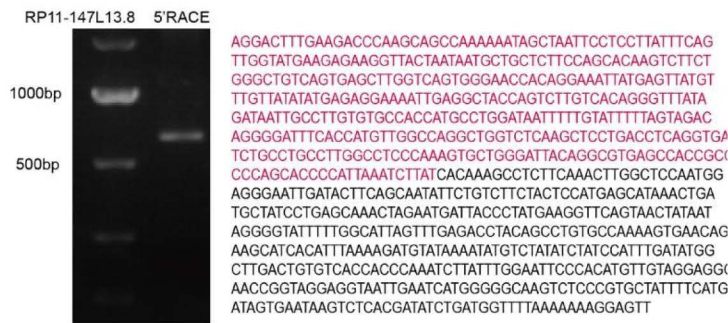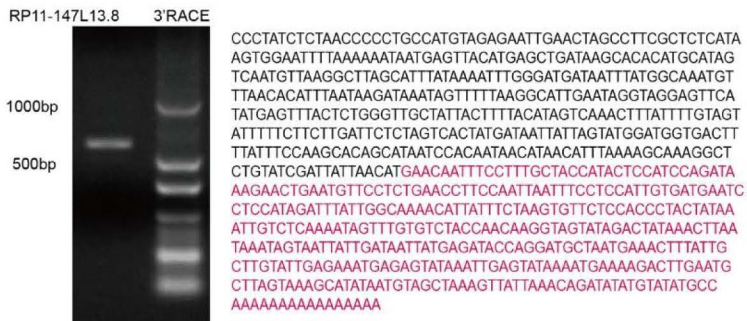

## C

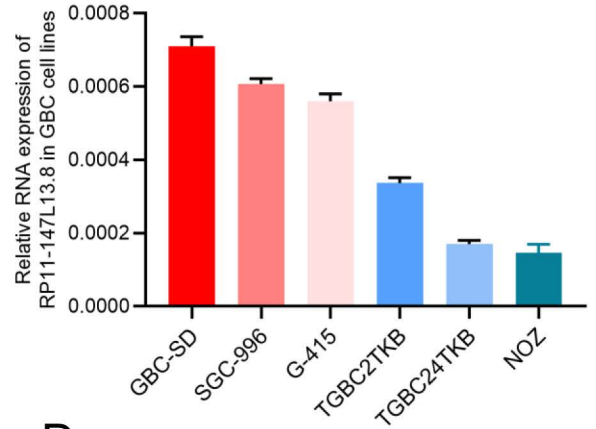

## D

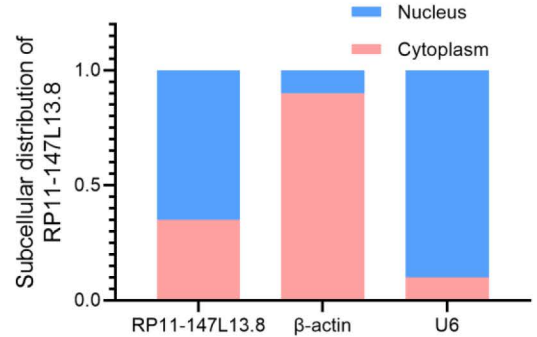

## E

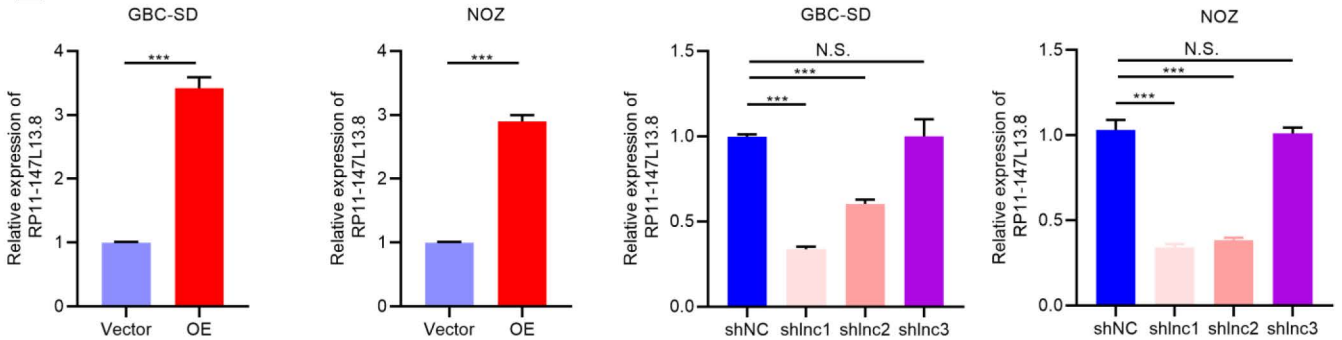

Figure S4

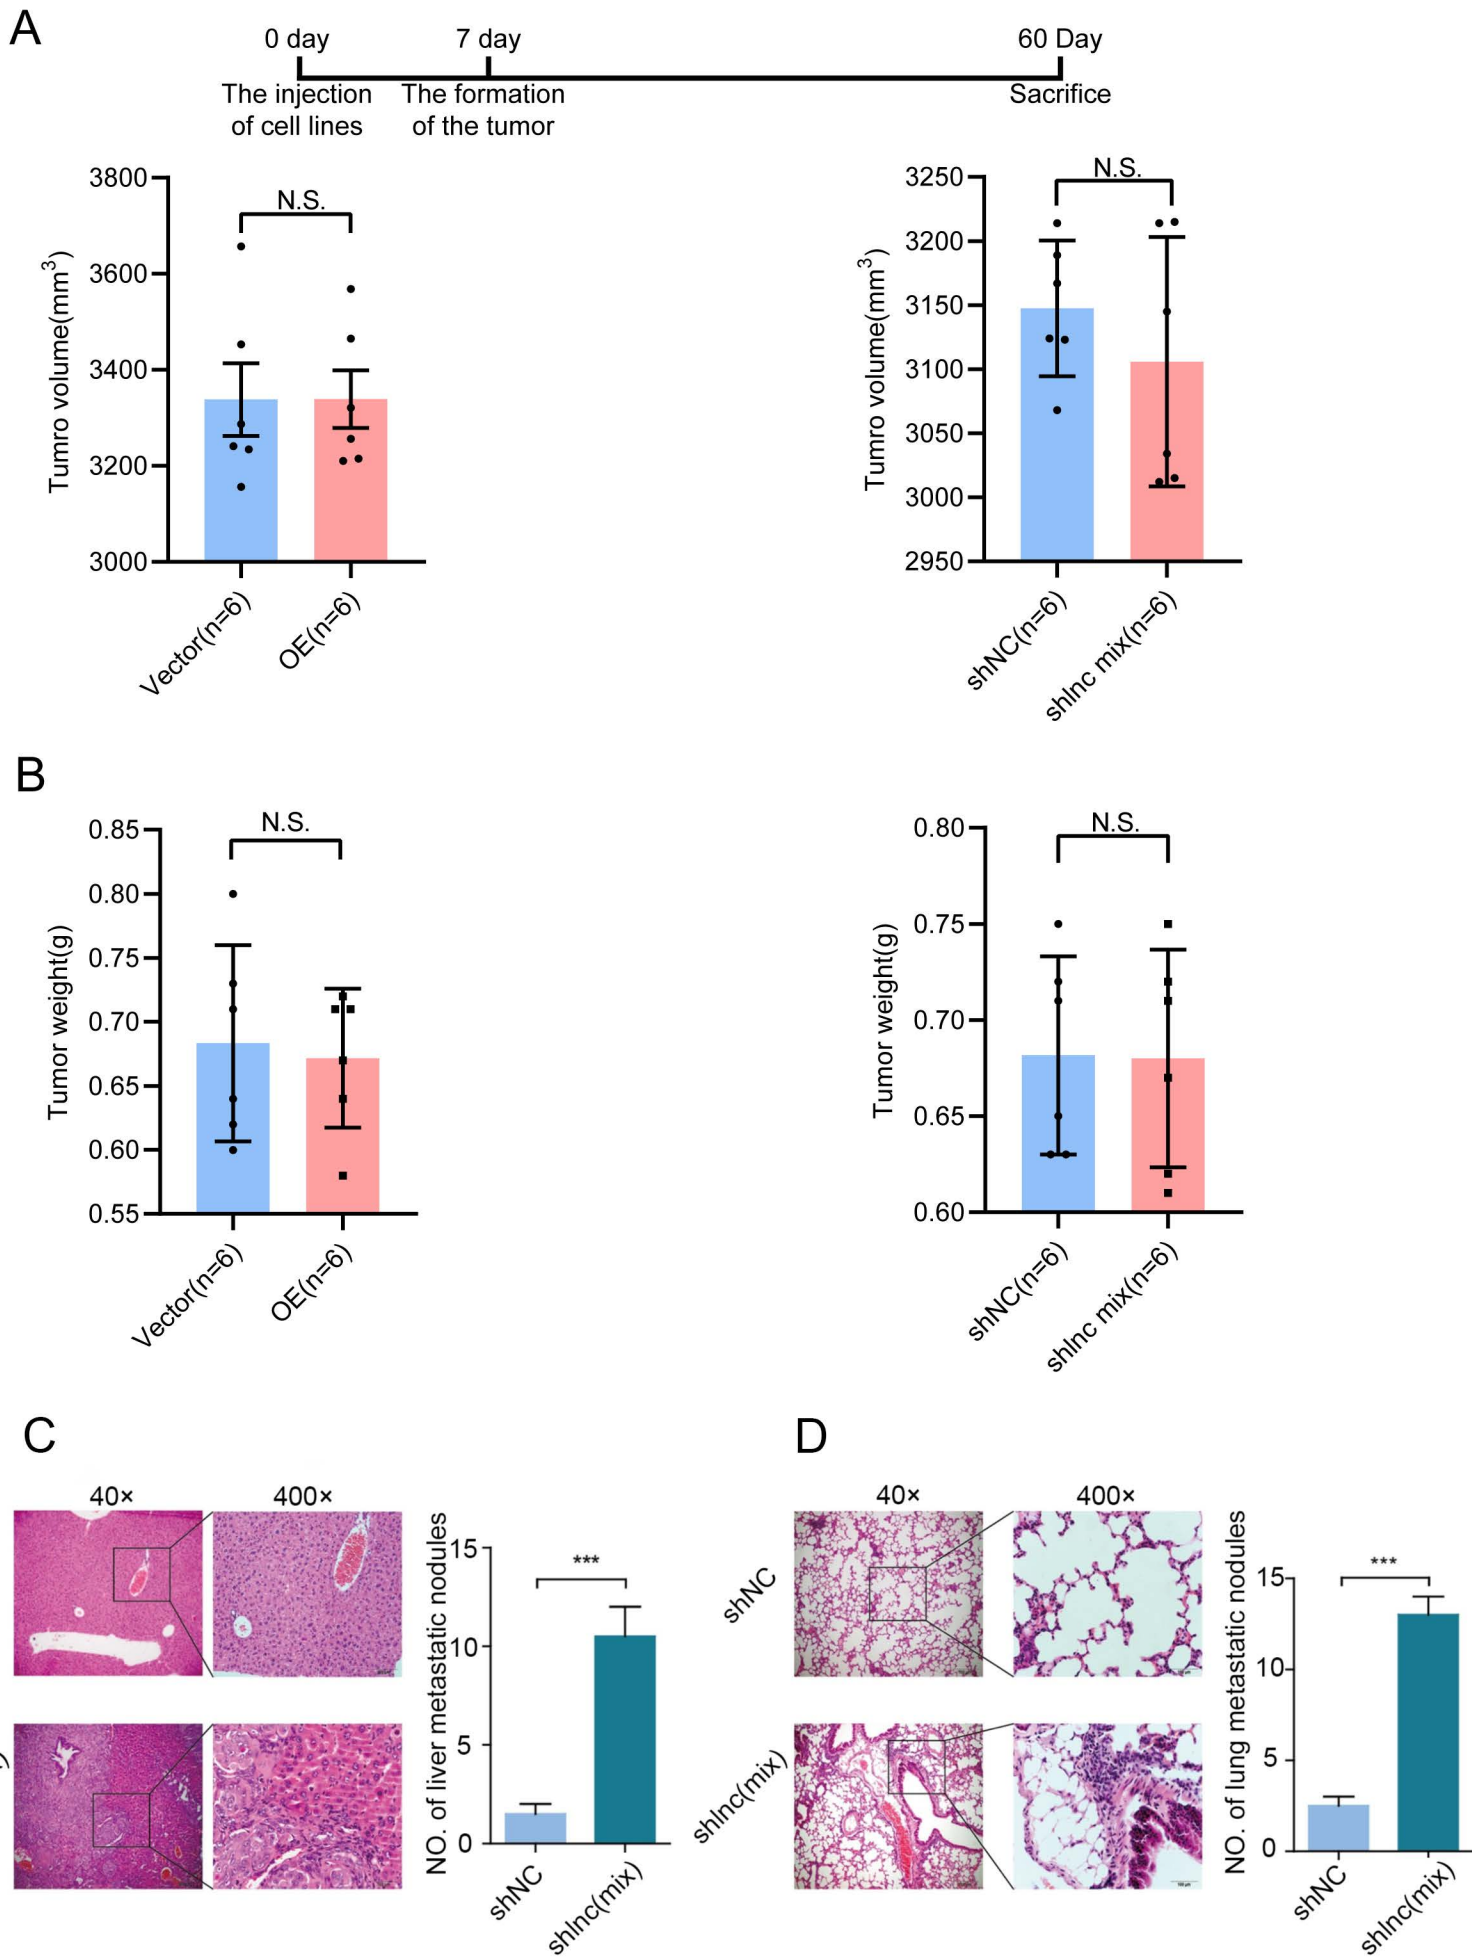

Figure S5

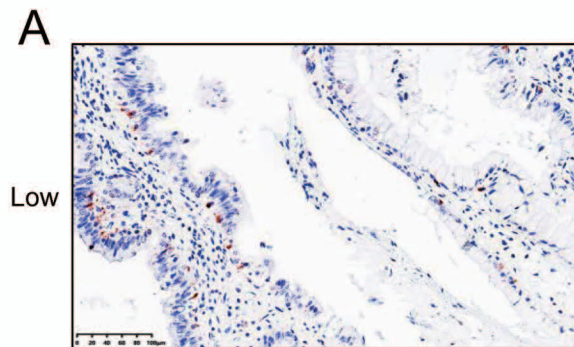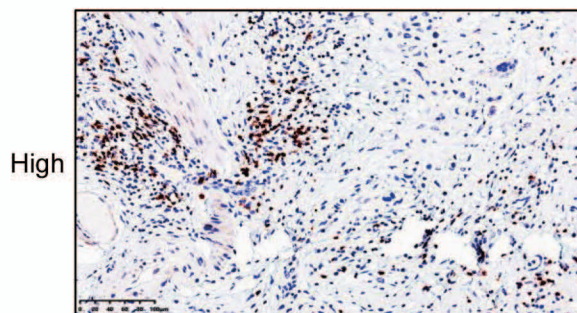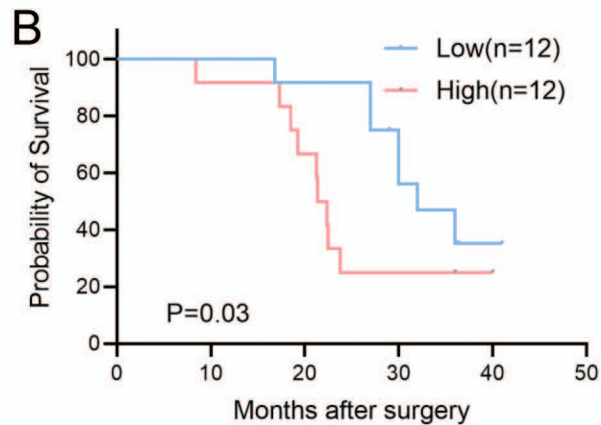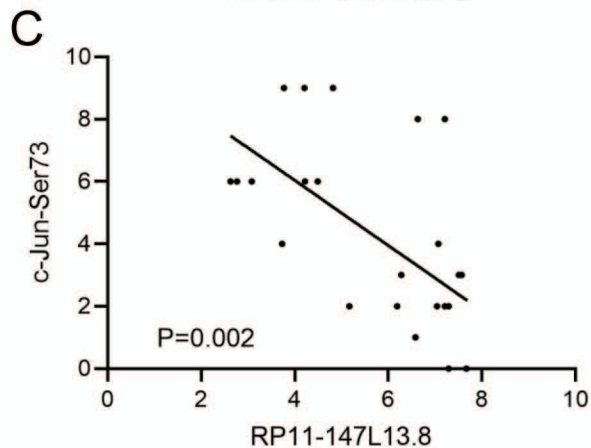



Figure S6

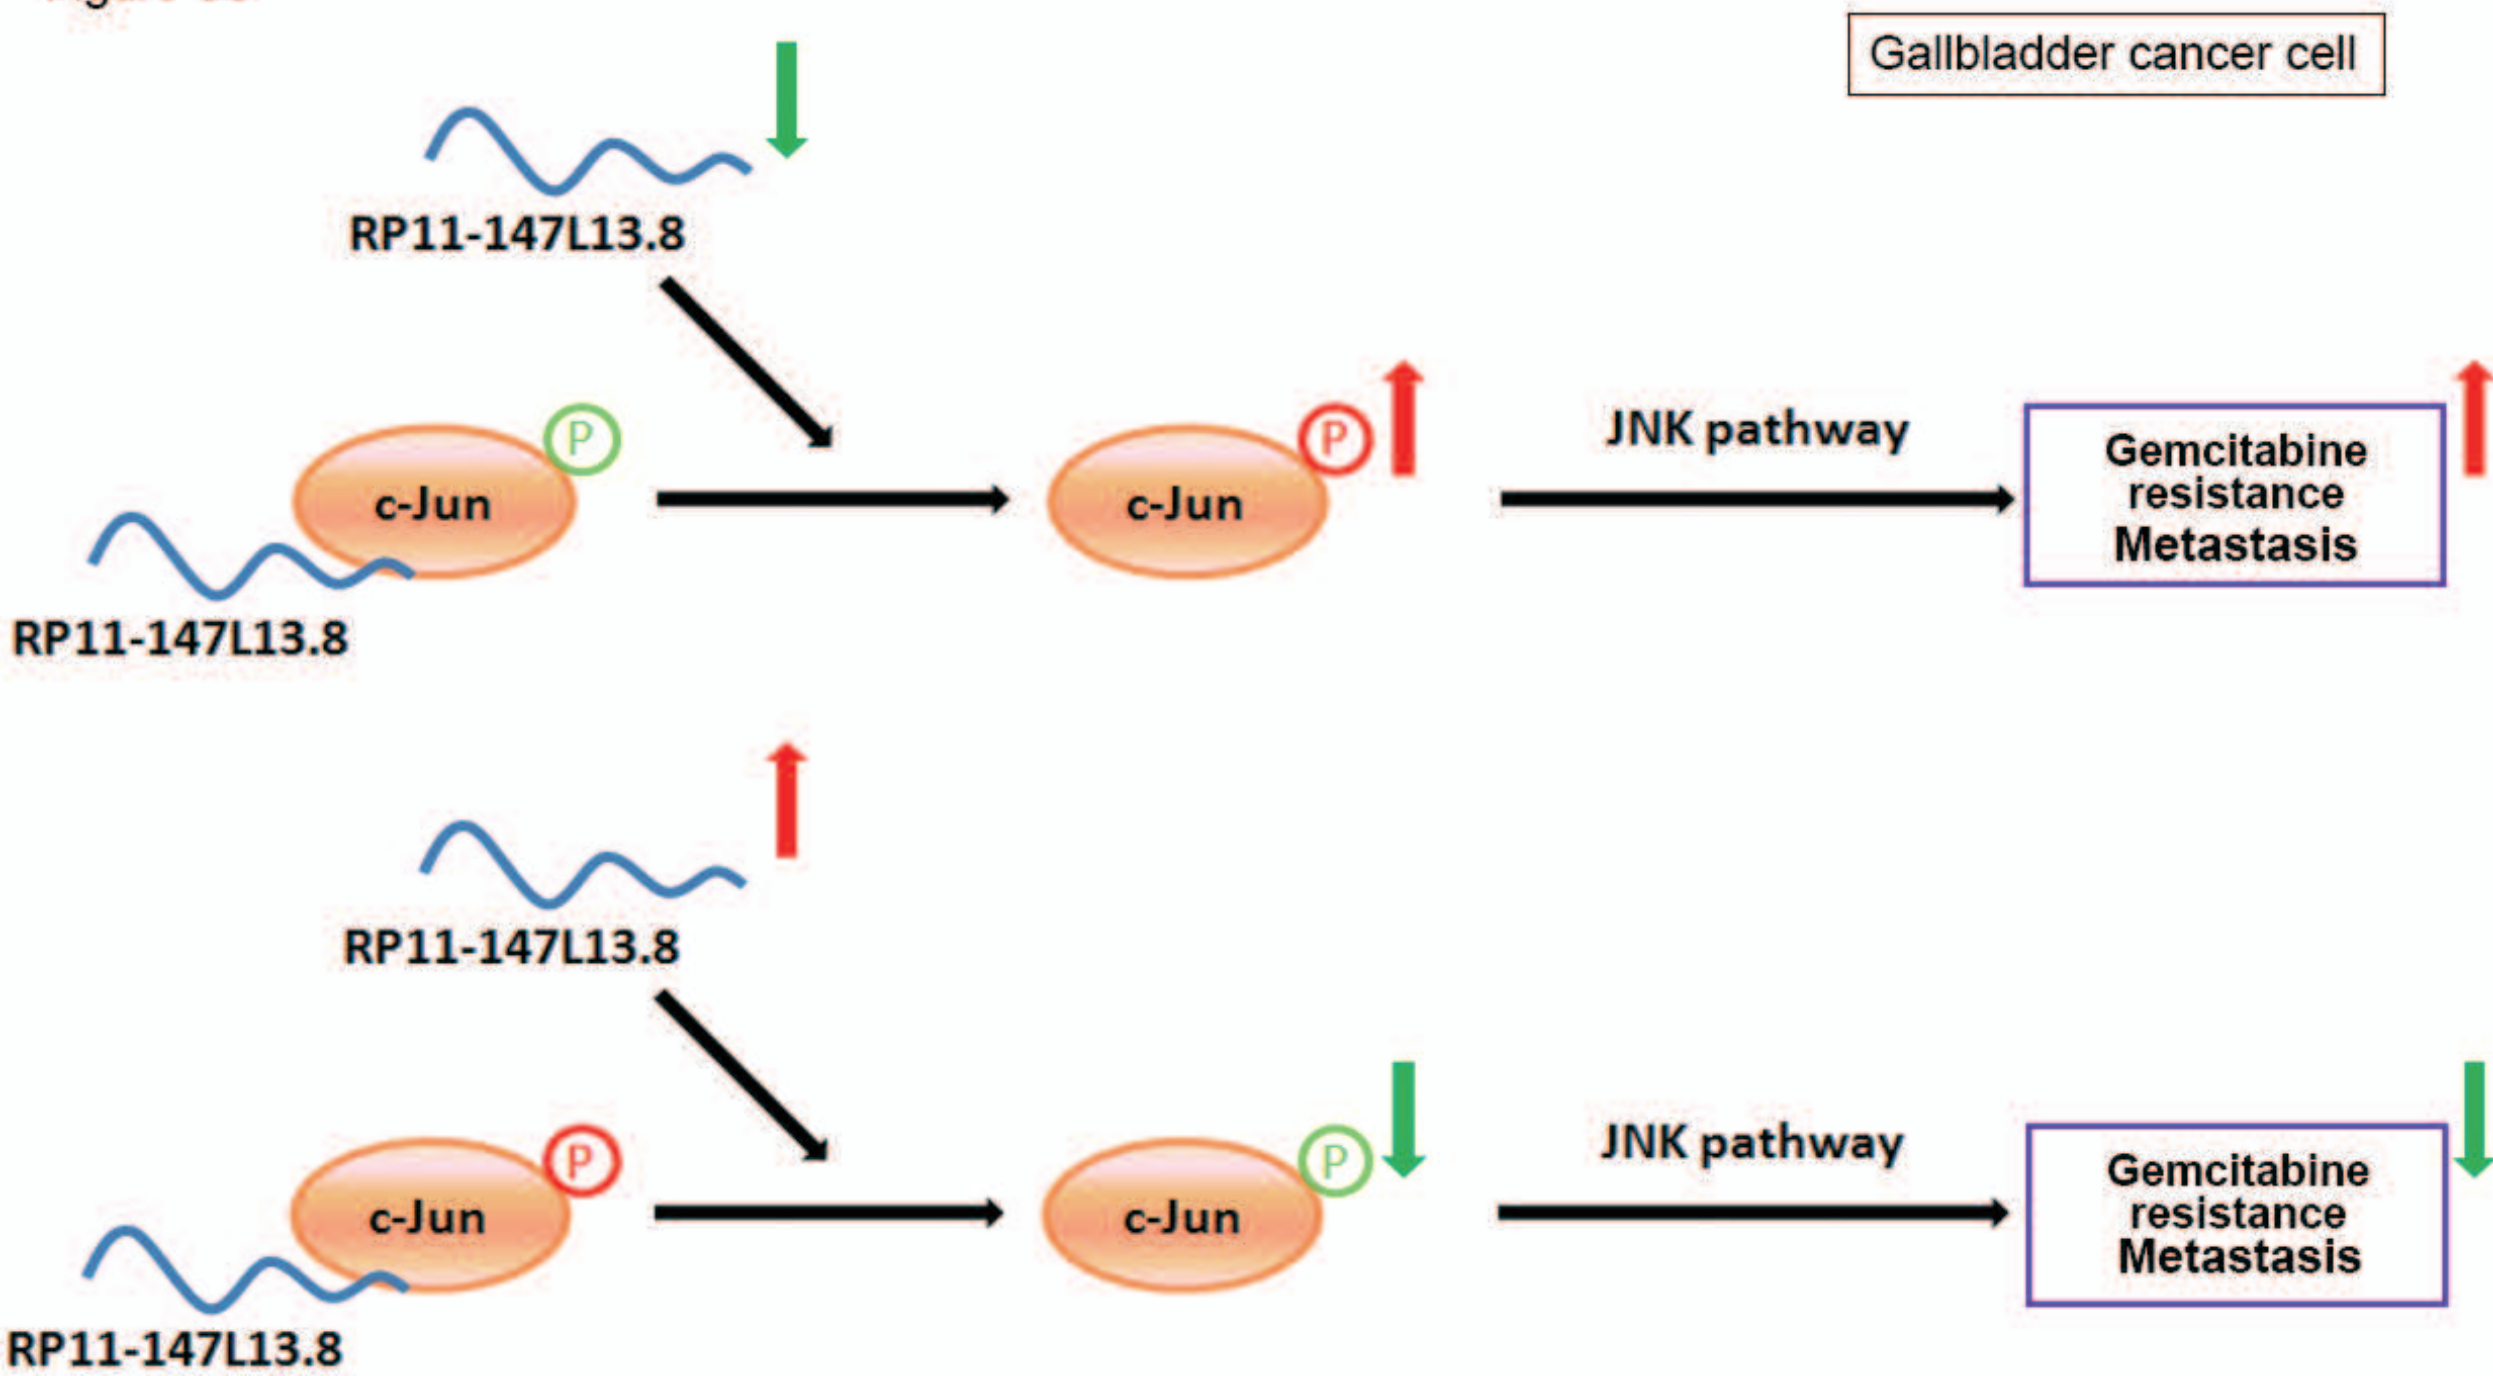

**Table S1 Primers used for reverse transcription-quantitative polymerase chain reaction.**

|               | Forward primer (5'-3')        | Reverse primer (5'-3')         |
|---------------|-------------------------------|--------------------------------|
| GAPDH         | 5'- AGCCACATCGCTCAGACAC-3'    | 5'- GAATTTGCCATGGGTGGA-3'      |
| RP11-147L13.8 | 5'- CGATCCTCCCCTCCAACACT-3'   | 5'-ACTCCAAGGAAGGAACCCCC-3'     |
| LINC01184     | 5'-AAAGAAGCTGAAAGGGCTCGG-3'   | 5'-AGCCATCCTCCACTGCAAAC-3'     |
| AC015712      | 5'-CTGTGGTTCTGCCTCACAGG-3'    | 5'-TGCCAGATGAGGTTGAGCTG-3'     |
| AC009242      | 5'-AGACCACCACCACCAATTCC-3'    | 5'-TGGAGGATGTGCCAGAGGTA-3'     |
| LINC00667     | 5'-CCGCAGCTGACACCATGAAT-3'    | 5'-ACCCACCTCTATCTGACGGC-3'     |
| ADAMTS9-AS2   | 5'-GAGACACAGCTGGGCTGAAC-3'    | 5'-GCTGCTAGCTCTTCTGGTGC-3'     |
| AC234582      | 5'-AAAGAAGCTGAAAGGGCTCGG-3'   | 5'-AGCCATCCTCCACTGCAAAC-3'     |
| LNCTAM34A     | 5'-AGCGGCATCTCCTCCACCTGAAA-3' | 5'-TTGCCTCGTGAGTCCAAGGAGAAT-3' |
| RNF216P1      | 5'-AGTGTGGCTGGTATCGGTGT-3'    | 5'-TGGAGTCACAGGCAGTCGTA-3'     |
| MIR205HG      | 5'- GGAGTGCAGTGGCTCAATCT-3'   | 5'- TGGATTGCTTAAGCTCAGGA -3'   |

**Table S2 Primary antibodies used for western blot**

| <b>Antibodies</b>     | <b>Concentration</b>                    | <b>Specificity</b> | <b>Company</b>            |          |
|-----------------------|-----------------------------------------|--------------------|---------------------------|----------|
| GAPDH                 | 1:1000 WB                               | Rabbit mAb         | Abcam                     | EPR13796 |
| c-Jun                 | 1:1000 WB                               | Rabbit mAb         | Cell Signaling Technology | 60A8     |
| Phospho-c-Jun (Ser73) | 1:1000 WB<br>1:100 immunohistochemistry | Rabbit mAb         | Cell Signaling Technology | D47G9    |

Table S3 The pull down protein list of the RP11-147L13.8

| Accession | Gene Symbol | Description                                                                       | Coverage [%] | # Peptides | # PSMs | # Unique Peptides |
|-----------|-------------|-----------------------------------------------------------------------------------|--------------|------------|--------|-------------------|
| P60709    | ACTB        | Actin, cytoplasmic 1 OS Homo sapiens GN=ACTB PE=1 SV=1                            | 12           | 9          | 8      | 4                 |
| Q86U42    | PABP2       | Polyadenylate-binding protein 2 OS Homo sapiens GN=PABP2 PE=1 SV=2                | 30           | 11         | 12     | 5                 |
| O95361    | TRIM16      | Tripartite motif-containing protein 16 OS Homo sapiens GN=TRIM16 PE=1 SV=2        | 27           | 6          | 6      | 5                 |
| Q9NRW3    | APOBEC3C    | DNA dC->dU-editing enzyme APOBEC-3C OS Homo sapiens GN=APOBEC3C PE=1 SV=2         | 18           | 5          | 5      | 5                 |
| P05412    | JUN         | Transcription factor AP-1 OS Homo sapiens GN=JUN PE=1 SV=1                        | 35           | 15         | 15     | 14                |
| P67809    | YBOX1       | Y-box-binding protein 1 OS Homo sapiens GN=YBOX1 PE=1 SV=1                        | 11           | 7          | 5      | 3                 |
| E7EX29    | E7EX29      | 14-3-3 protein zeta/delta OS Homo sapiens GN=E7EX29 PE=1 SV=1                     | 9            | 3          | 2      | 1                 |
| Q9BQ67    | GRWD1       | Glutamate-rich WD repeat-containing protein 1 OS Homo sapiens GN=PGRWD1 PE=1 SV=2 | 10           | 1          | 1      | 1                 |
| O43395    | PRPF3       | U4/U6 small nuclear ribonucleoprotein Prp3 OS Homo sapiens GN=PRPF3 PE=1 SV=2     | 13           | 1          | 1      | 1                 |

## **Supplementary Method**

### **RNA sequencing**

Total RNAs were collected by TRIzol reagent (Invitrogen), then rRNAs were removed by using the RiboMinus Eukaryote kit (Qiagen, Valencia, CA, USA). We next prepared the RNA-seq libraries using NEBNext Ultra Directional RNA Library Prep Kit (New England Biolabs, Beverly, MA, USA) according to the manufacturer's instructions. The ribosome-depleted RNA libraries were subjected to Illumina HiSeq3000 (Illumina, San Diego, CA, USA) for sequencing. The raw sequencing reads were first processed to clip adapter sequences and low-quality bases by software Trimmomatic. Afterward, all filtered reads were aligned to the human reference genome (hg38) using the splice-aware aligner HISAT2. The Cufflinks program was used to calculate the gene expression level in FPKM units (FPKM = Fragments Per Kilobase of transcript per Million mapped reads).

### **Survival analysis**

Survival analysis was performed as described in a previous study [39]. Details were listed in the supplementary materials. Briefly, the expression levels of each lncRNA across all tumor samples in each sample group were used to explore whether they were associated with the prognosis status of tumor patients. For each lncRNA, GBC tumor samples were divided into two groups according to the median value of the expression. Then, the log-rank test was used to compare the difference between the two groups.

### **Northern blot assays and western blot assays**

The Ambion Northern Max-Gly Kit (Austin, Texas, USA) was employed to detect *RP11-147L13.8* RNA levels in tissue and cells. Briefly, the nylon membrane (NC) with a positive charge was utilized to electrophorese and siphon the extracted total RNA samples. UV cross-linking was conducted to fix the RNA on the NC membrane. Then, the DIG Northern Starter Kit (Roche, Indianapolis, Indiana, USA) with a Digoxin-labelled RP11-147L13.8-specific oligonucleotide probe was employed to detect *RP11-147L13.8*.

The SDS-PAGE was employed to separate proteins and transfer proteins to nitrocellulose membranes (Bio-Rad, Hercules, California, USA), which were blocked with 5% non-fat milk and incubated with corresponding primary antibodies followed by horseradish peroxidase-conjugated secondary antibodies. Then, the chemiluminescence ECL reagents (Pierce Biotechnology, Illinois, USA) were utilized for visualization of the immunoreactivity. Additionally, the densitometry was measured by Image-Pro Plus 6.0 (Media Cybernetics, Maryland, USA). The antibody used for western blot assays were listed is **Table S2**.

### **RNA interference and lentivirus construction**

The short hairpin RNA (shRNAs) oligonucleotides used for RP11-147L13.8 in the current study were purchased from RiboBio (Guangzhou, China). The human RP11-147L13.8 sequence was amplified from cDNAs. The pCDH-RP11-147L13.8 was generated by cloning the RP11-147L13.8 sequence into the BamHI and EcoRI sites of pCDH lentiviral vectors. The pCDH, pCDH-RP11-147L13.8 were transfected along with the packaging plasmid psPAX2 and the envelope plasmid pMD2G into the GBC cell lines by using Lipofectamine 2000 (Invitrogen) according to the manufacturer's instructions. The virus particles were collected 48h after transfection then were infected into GBC cells with recombinant lentivirus-transducing units using 1 µg/ml polybrene (Sigma-Aldrich, Missouri, USA).

### ***In vitro* cell migration and invasion assays and *in vivo* metastasis assays**

The invasion assays were performed in Millicell chambers that were coated with 30µg of Matrigel (BD Biosciences, Franklin Lakes, New Jersey, USA). Similar operations were conducted in the migration assays but without a coated membrane. The cells ( $5 \times 10^4$  and  $1 \times 10^5$  for migration and invasion assays, respectively) were added to the upper chambers. DMEM containing 10% FBS was placed into the lower chambers as a chemoattractant. The cells were then incubated at 37°C with 5% CO<sub>2</sub> for 24h. After the incubation, we fixed the cells that migrated or invaded through the filters with 20% methanol. Then fixed cells were then stained with 0.1% crystal violet. We randomly selected five fields to count the cell numbers by using an inverted microscope (Olympus, Tokyo, Japan).

Nude mice (female BALB/c-nu/nu mice) were purchased from the Experimental Animal Center of Shanghai Cancer Institute (Shanghai, China) for our *in vivo* metastasis assays. GBC-SD cells ( $1 \times 10^6$  sh vector or stable sh*RP11-147L13.8* GBC-SD cells) that were suspended in 0.2 ml serum-free DMEM were injected subcutaneously into each mouse (10 mice for each group) through the right axilla. The tumor growth was monitored. The mice were sacrificed after 60 days, then livers and lungs were dissected. The liver and lung tissue derived from the mice were fixed with phosphate-buffered neutral formalin and prepared for the following histological examination. The hematoxylin-eosin (H&E) staining was utilized to determine the number of metastatic foci in the liver or lung tissue under a binocular microscope (Leica, Wetzlar Lottehaus, Germany). The tumor volume was measured as  $\text{length} \times \text{width}^2 \times 0.5$ . Experiments performed in this part were all under the regulations of the Shanghai Medical Experimental Animal Care Commission.

#### **RNA pull-down assays, mass spectrometry analyses, and RNA immunoprecipitation (RIP) assays**

First, *RP11-147L13.8* and antisense *RP11-147L13.8* were transcribed *in vitro* and labeled with the Biotin RNA Labelling Mix (Roche, USA). The RNA samples were treated with RNase-free DNase I (Takara, Japan) then purified with an RNeasy Mini Kit (QIAGEN, USA). Second, to format an appropriate secondary structure, an RNA structure buffer was used to pre-treat the biotinylated RNAs. Then the pre-treated biotinylated RNAs were incubated with 1 mg protein extracts at 4°C for 1 h. After the incubation, 40  $\mu\text{l}$  streptavidin-linked magnetic beads (ThermoFisher, USA) were utilized to perform the pull-down at room temperature for 2h. Next, the beads-RNA-proteins mixture was washed in  $1 \times$  washing buffer (5mM Tris-HCl, 1 M NaCl, 0.5 mM EDTA, and 0.005% Tween 20) five times. The precipitation and dilution were conducted in 60  $\mu\text{l}$  protein lysis buffer, then the proteins were separated by using gel electrophoresis. And the visualization was shown after silver staining according to the manufacturer's instructions. Finally, the retrieved proteins were measured on SDS-PAGE gels for mass spectrometry analysis (Shanghai Applied Protein Technology, Shanghai, China) or Western blot.

The Magna RIP RNA-binding protein immunoprecipitation kit (Millipore, Massachusetts, USA) was employed to conduct the RIP assays in the current study. In brief, lysis buffer (0.5 ml) were utilized to lyse cells in 10 cm dishes with protease inhibitors and RNase Inhibitor (Thermo Fisher Scientific, Illinois, USA) according to the manufacturer's instructions. The lysed cells were then subjected to centrifuge at 12,000 r.p.m. for 30 min. Then the supernatants were incubated with Protein G Dynabeads (Thermo Fisher Scientific, California, USA) and indicated antibodies. After incubation at 4°C for 12 h, the beads were washed thrice with wash buffer then twice with PBS. Both the wash buffer and PBS contained RNase inhibitor. The Total RNA isolation kit (Thermo Fisher Scientific) was employed to extract co-precipitated RNAs, which were then subjected to qRT-PCR assays.

#### **Immunoblotting analysis and co-immunoprecipitation (Co-IP).**

The immunoblotting analysis was The lysis buffer (Beyotime Biotechnology, Shanghai, China) with protease inhibitors (Roche, Indiana, USA) was employed to lyse cells ( $5 \times 10^6$ ). The BCA method was used to determine protein concentrations (Pierce, Thermo Fisher Scientific, Illinois, USA). SDS-PAGE was utilized to analyze the samples after centrifugation at 4°C for 15 min. The samples then were transferred to PVDF membranes (Immobilon-P membrane, Millipore, Massachusetts, USA) and HRP-conjugated secondary antibodies were employed in the following immune blotting analysis. Specifically, TBS plus Tween 20 with skimmed milk (5%) were used to block the membranes at 4°C before the probing was conducted. Finally, the assay results were visualized by employing the Enhanced Chemiluminescence Plus Western Blotting Detection Systems (GE Healthcare, Connecticut, USA) and LAS-4000EPUV mini Luminescent Image Analyzer with enhanced chemiluminescent (ECL) chromogenic substrates.

The details of the Co-IP were listed below. Briefly, plasmids were transiently transfected to cell lines at the 60% confluence for 48 h, and then cells in a 10 cm dish were lysed by 0.3% NP40 (with protease inhibitor, 1 mM PMSF, and phosphatase inhibitor, 1 mM  $\text{Na}_3\text{VO}_4$ ) on ice. Cell lysates were incubated with GFP, Flag, or HA



beads overnight at 4 °C. Protein precipitate was harvested through centrifugation at 12,000 rpm for 10 min, washed with PBS, added with 2 × SDS sample buffer for immunoblotting samples preparation. Protein samples were separated by SDS-PAGE electrophoresis, transferred onto PVDF membrane, blocked with 5% non-fat milk for 1 h at room temperature, incubated with primary antibody overnight at 4°C, washed with PBST three times for 10 min each time, then incubated with HRP-conjugated secondary antibody for 1h at room temperature, and washed with PBST three times for 10 min each time. Finally, the target proteins were visualized.

### **5' and 3' rapid amplification of cDNA ends (RACE) analysis**

Total RNA was isolated using TRIzol Plus RNA Purification Kit (Invitrogen), according to the manufacturer's instructions. 5' RACE and 3' RACE were performed using GeneRacer™ Kit (Invitrogen) according to the manufacturer's instructions. The following gene-specific primers (GSP) are used for PCR: 5'-ATCGATTAAGGAGGAATAAAGTCAACC-3' (5' RACE GSP1), 5'-CCCGACAGTCACTCGAACCAGTCGAACC-3' (5' RACE GSP2), 5'-CCAGGTTTTGATCTCCTTGAAGCTCCACCTC-3' (3' RACE GSP1), 5'-CACCCGCTATATTGGCGCCACTGTAC-3' (3' RACE GSP2).

### **The isolation of cytoplasmic and nuclear RNA**

According to the manufacturer's instructions Cytoplasmic and nuclear RNAs of NOZ cells were extracted and purified using PARIS™ Kit (Invitrogen).

### **The establishment of gemcitabine-resistant GBC-SD cell line**

The GBC cell line, GBC-SD, was cultured in DMEM (Sigma–Aldrich-Merk, Darmstadt, Germany) complete medium containing 10% fetal bovine serum (FBS) (Sigma–Aldrich-Merk, Darmstadt, Germany), 100 U/mL penicillin, and 100 µg/mL streptomycin (Life Technologies Gathersburg, MD, USA). The gemcitabine resistant

clone, named GBC-R, was obtained by exposing parental cells intermittently to escalating doses of the drug, starting from 10 nM of GEM to 1.5  $\mu$ M for 9 months. After another 3 months of being continuously cultured in the presence of 1.5  $\mu$ M, the GBC-R1.5 cells were considered stable.
